# Supplementary material
Source: PubMed Central journal article supplement (PMC2714945)
Supplement: NIHMS128051-supplement-1.pdf [file NIHMS128051-supplement-1.pdf]

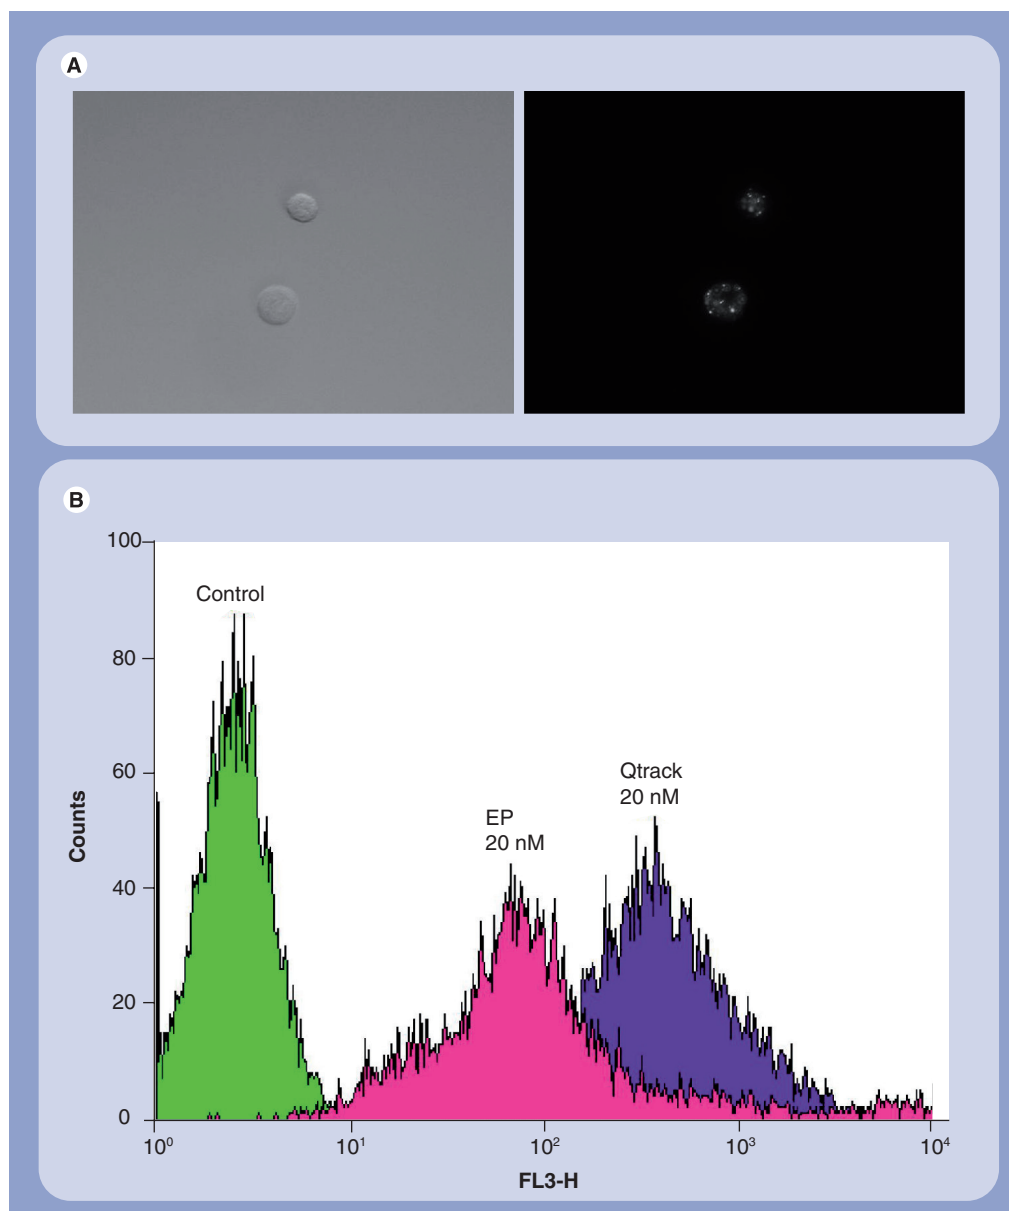

**Supplementary Figure 1. Comparison of cell-labeling methods with electroporation and endocytosis.** In order to compare the electroporation method with conventional endocytosis, we purchased quantum dot (QD)655 Qtracker<sup>®</sup> cell labeling kit from Invitrogen Corporation, which was used to monitor streptavidin-induced endocytosis of QDs. **(A)** Intracellular distribution of the fluorescence in labeled cells reflected the distribution of endo/lysosomes. **(B)** The fluorescence in labeled cells was a little stronger than that with the electroporation method, if incubated at the same concentration, with flow-cytometry analysis.
