# Supplementary material
Source: PubMed Central journal article supplement (PMC2714945)
Supplement: NIHMS128051-supplement-2.pdf [file NIHMS128051-supplement-2.pdf]

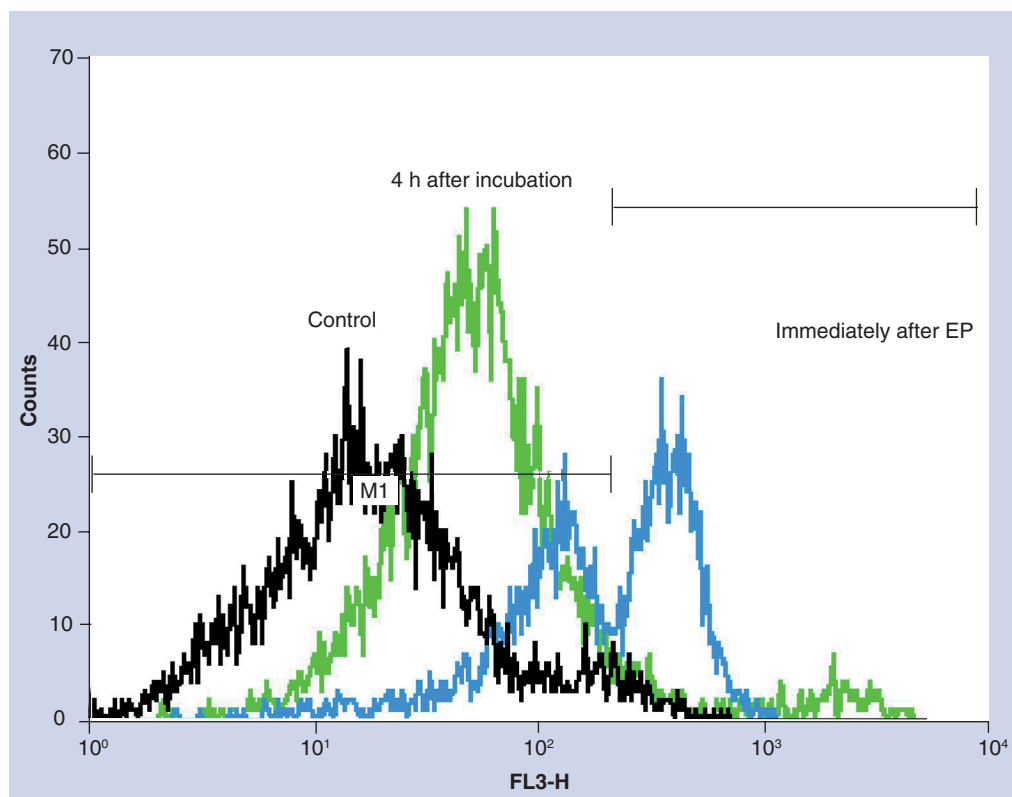

**Supplementary Figure 2. Annexin V–fluorescein isothiocyanate-stained flow cytometry results of quantum dot 655-labeled B16 CXCR4 cells.** In order to validate cell viability, labeled cells were examined with Trypan blue staining and Annexin V– fluorescein isothiocyanate (FITC) binding immediately after and 4 h after QD655 labeling with the electroporation method. As the cell membrane becomes loose immediately after electroporation, both Trypan blue and Annexin V–FITC could bind to cells. However, this damage was recovered after 4 h incubation at 37°C.
